# Supplementary material
Source: Springer Nature journal article supplement (https://www.springermedizin.de/resource/supplementary/12913_2013_3429_MOESM1_ESM.pdf/9532808)

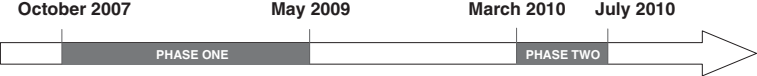

**Quantitative data**  
254 patients  
262 informal caregivers

**Qualitative data**  
19 informal caregivers

Supplement: MOESM1 [file 9532808]
